# Supplementary material
Source: PubMed Central journal article supplement (PMC10441171)

**Supplementary Figure 2** MCI unadjusted forest plot

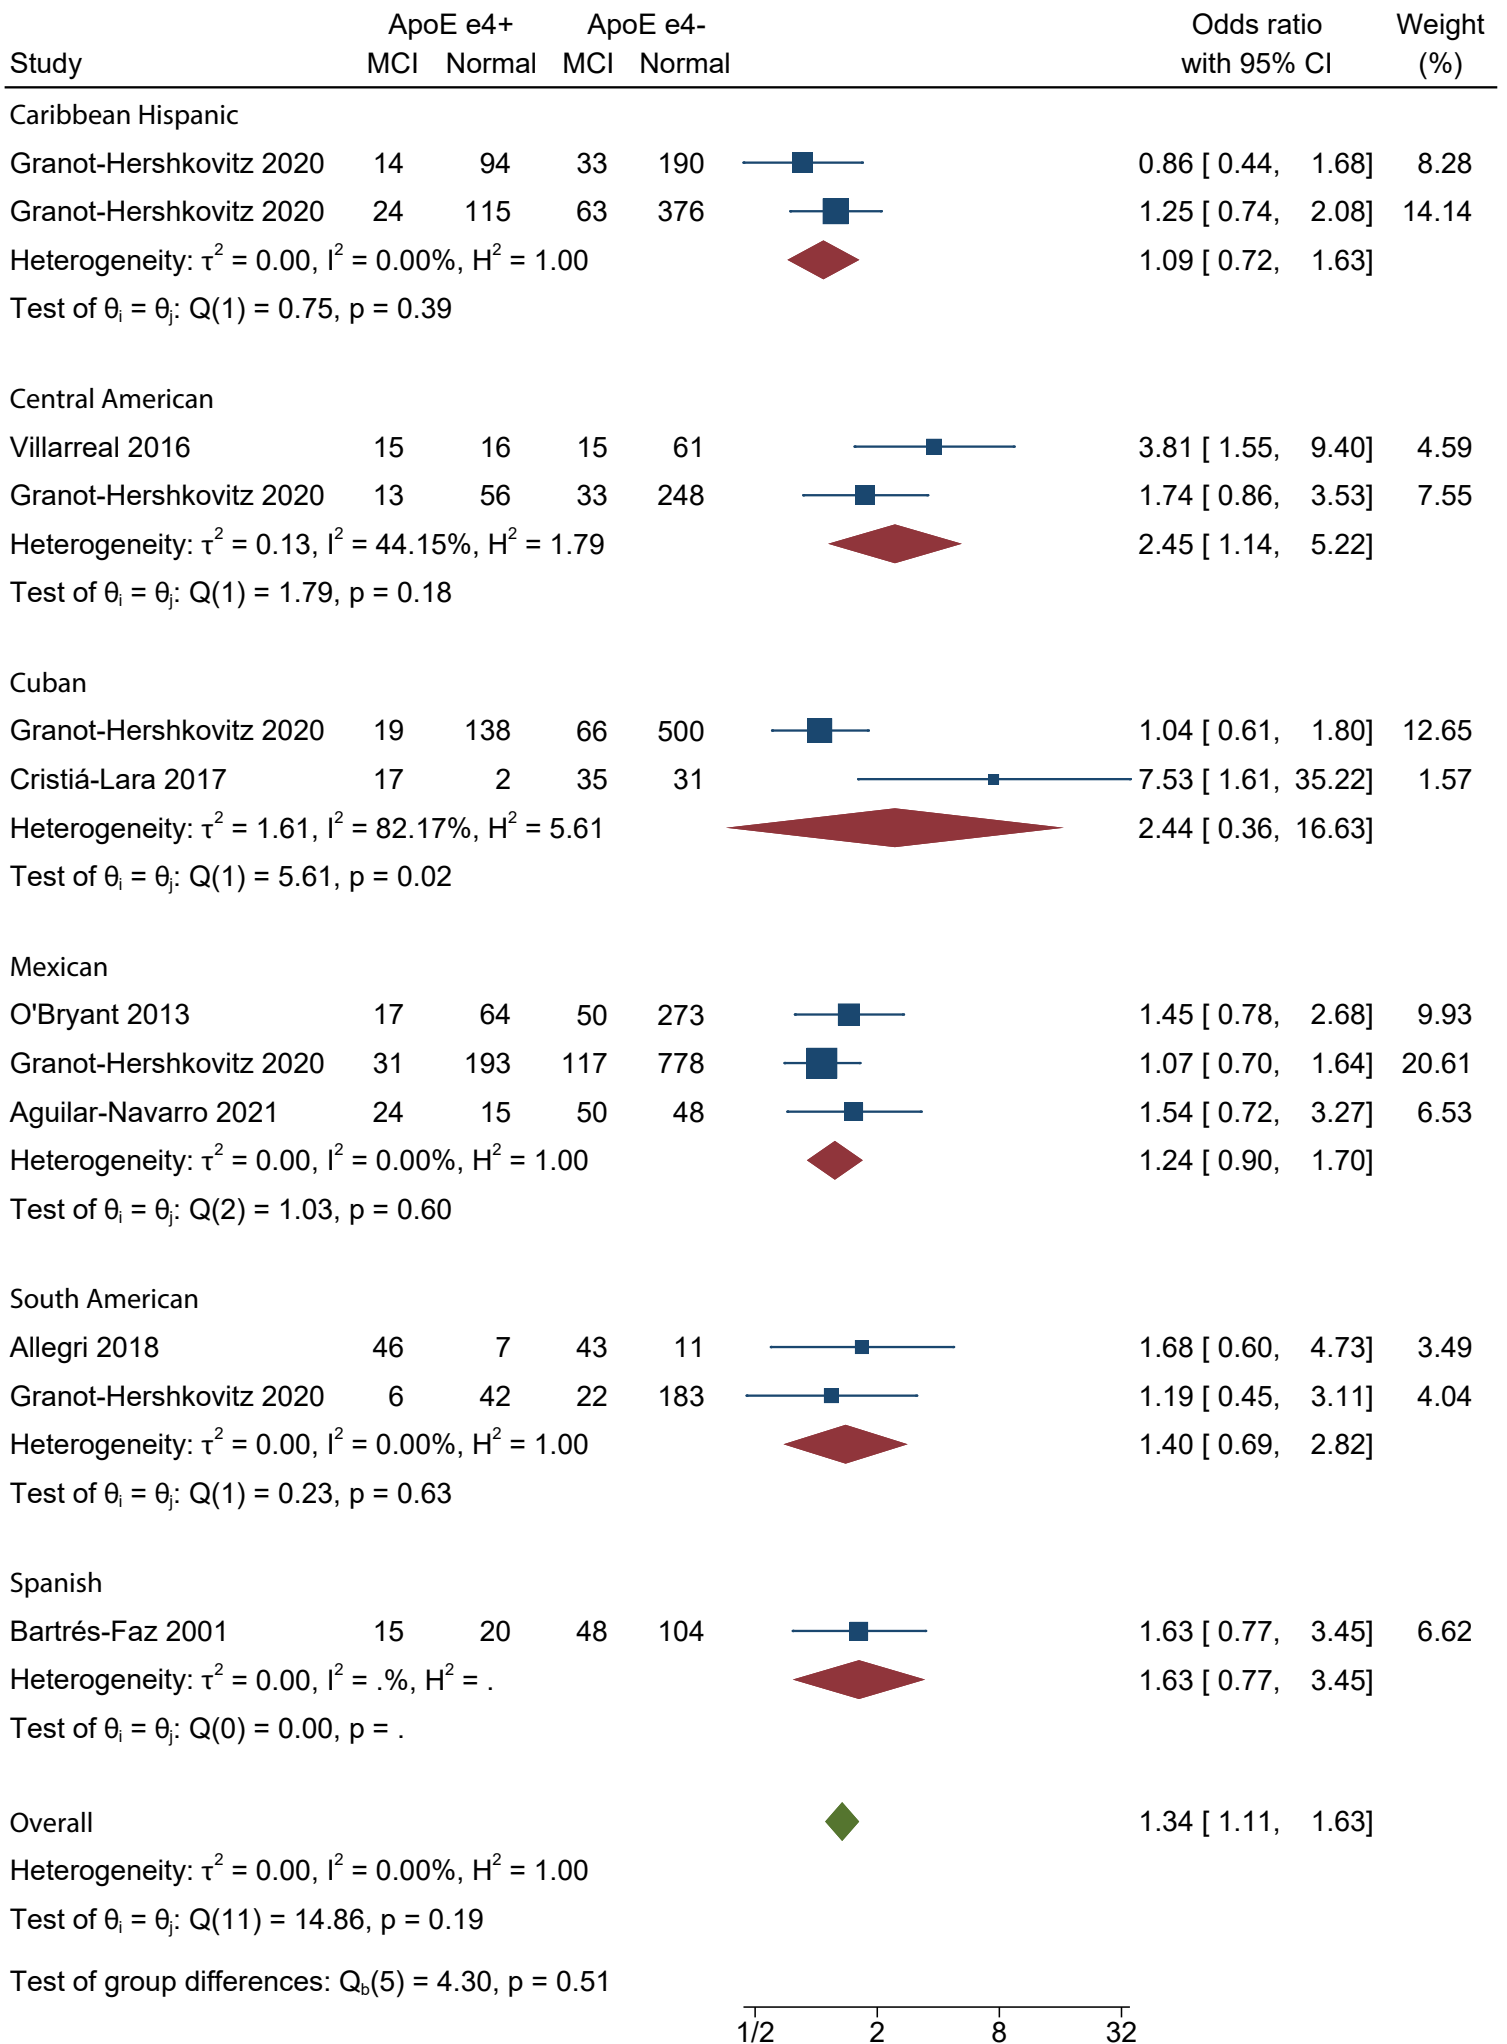

1/2 2 8 32

Supplement: NIHMS1923492-supplement-Supplementary_Figure_2.pdf [file NIHMS1923492-supplement-Supplementary_Figure_2.pdf]

Supplementary Figure 3 ADRD adjusted funnel plot

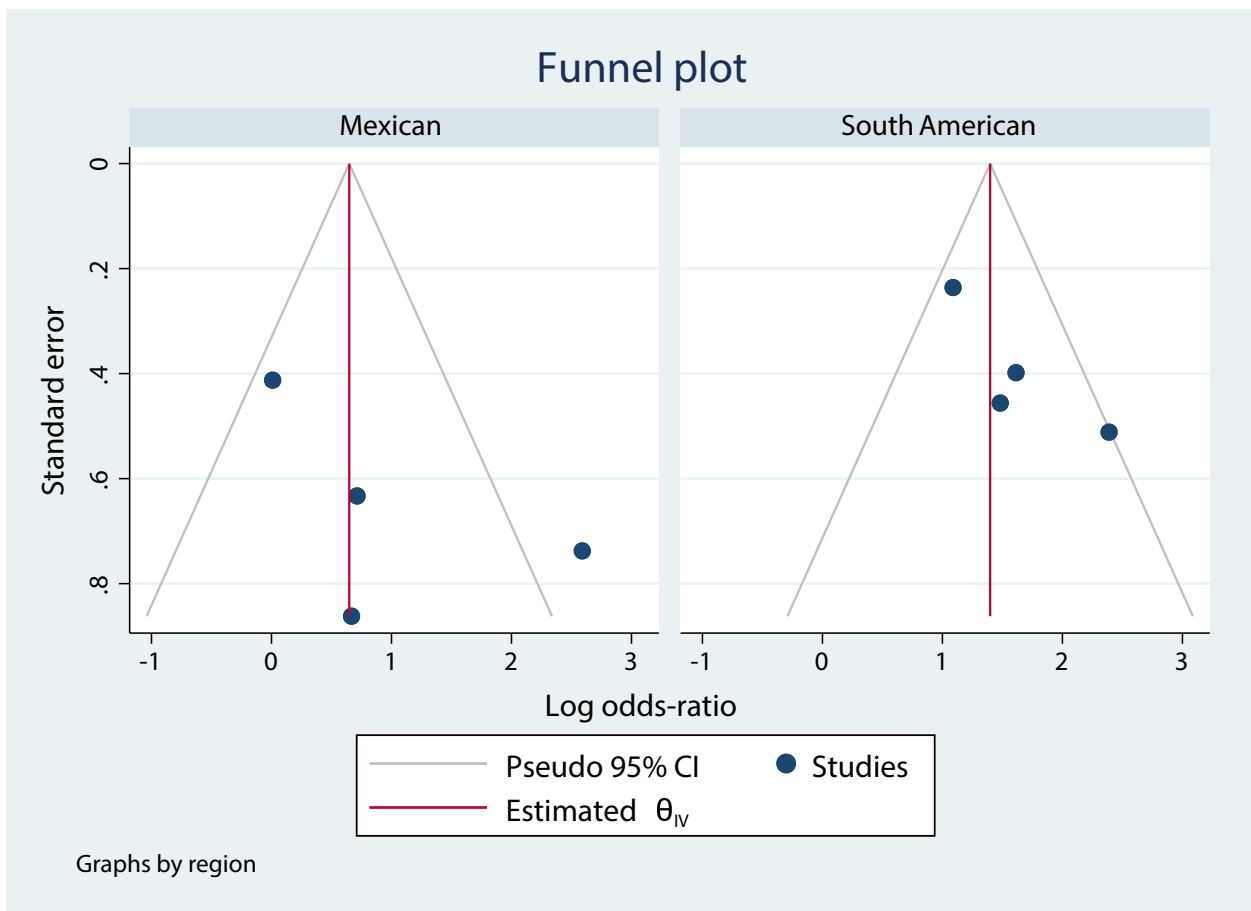

Supplement: NIHMS1923492-supplement-Supplementary_Figure_3.pdf [file NIHMS1923492-supplement-Supplementary_Figure_3.pdf]

Supplementary Figure 4 ADRD unadjusted funnel

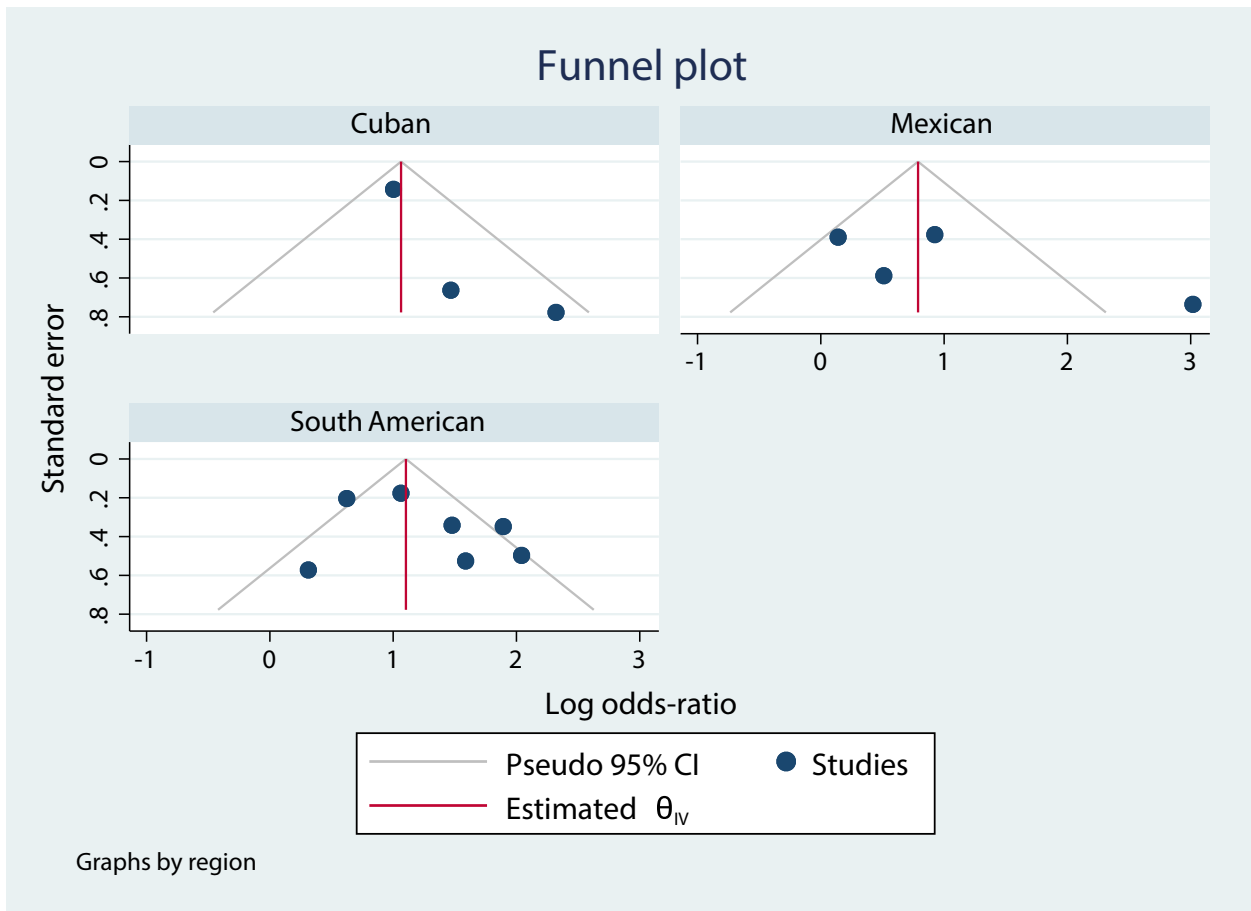

Supplement: NIHMS1923492-supplement-Supplementary_Figure_4.pdf [file NIHMS1923492-supplement-Supplementary_Figure_4.pdf]

Supplementary Figure 5 MCI unadjusted funnel

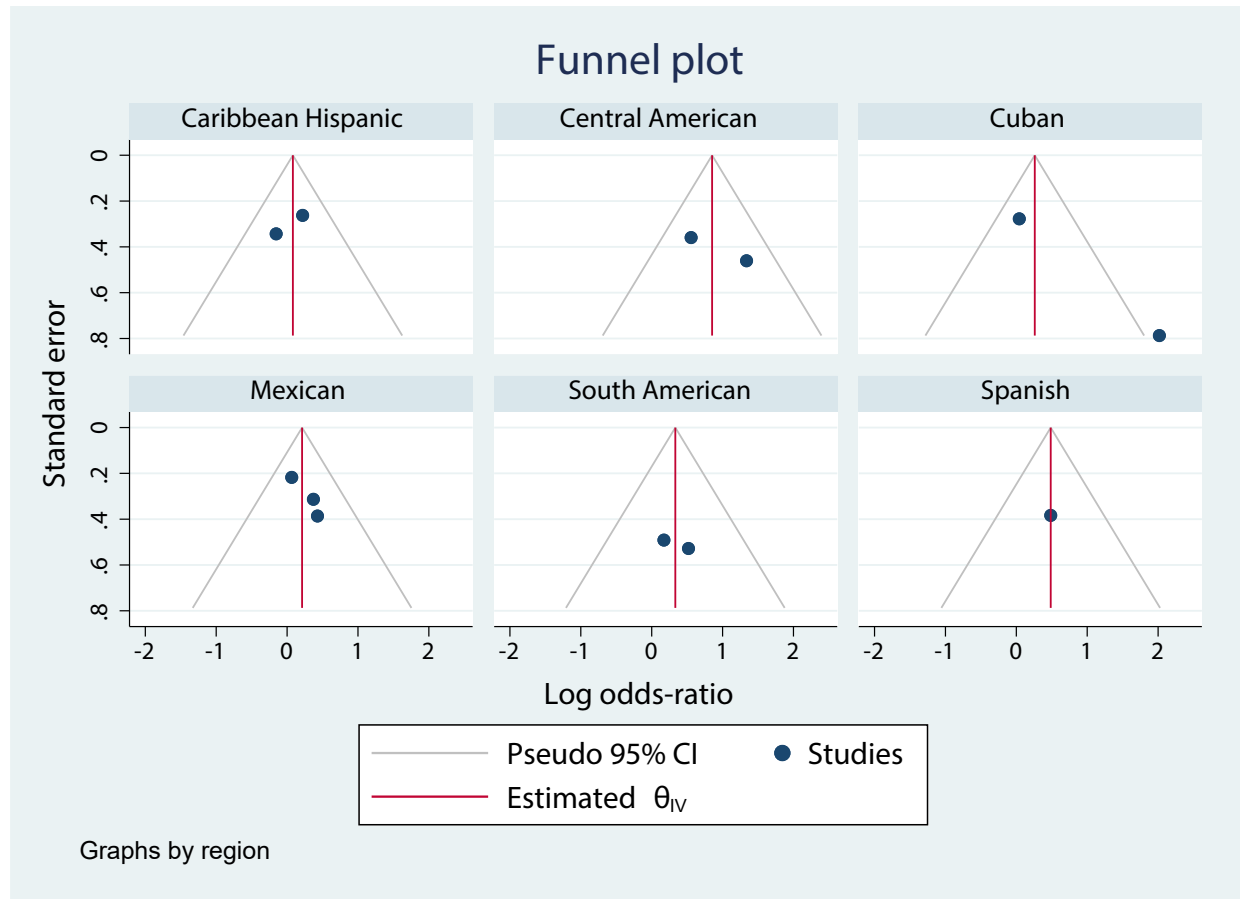

Supplement: NIHMS1923492-supplement-Supplementary_Figure_5.pdf [file NIHMS1923492-supplement-Supplementary_Figure_5.pdf]
